# Supplementary material for: Carbon source–sink relationship in Arabidopsis thaliana: the role of sucrose transporters
Source: PubMed Central journal article supplement (PMC5809531; doi:10.1007/s00425-017-2807-4), 2017-11-14
Supplement: 425_2017_2807_MOESM1_ESM.pdf [file 425_2017_2807_MOESM1_ESM.pdf]

Figure S1

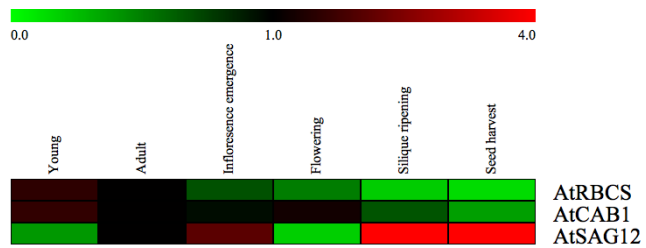

Figure S2

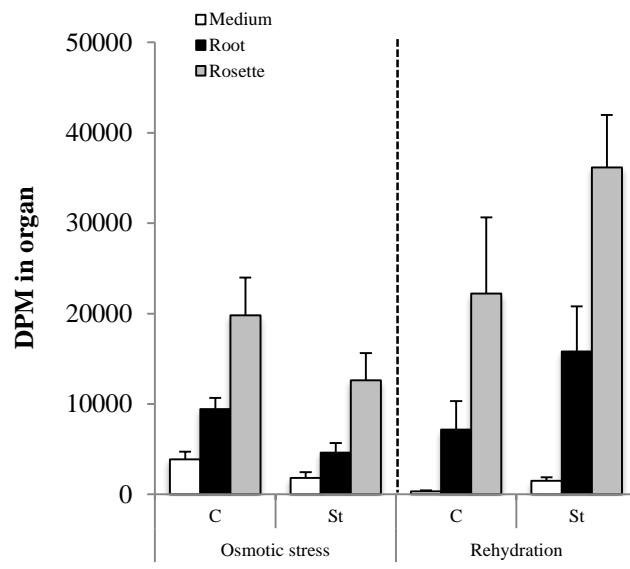

**Table S1.** Primers used to study the expression pattern of the corresponding genes. Nine *AtSUC* genes: *AtSUC1* (*At1g71880*), *AtSUC2* (*At1g22710*), *AtSUC3* (*At2g02860*), *AtSUC4* (*At1g09960*), *AtSUC5* (*At1g71890*), *AtSUC6* (*At5g43610*), *AtSUC7* (*At1g66570*), *AtSUC8* (*At2g14670*), *AtSUC9* (*At5g06170*) and 7 genes of *AtSWEET* (clade III): *AtSWEET9* (*At2G39060*), *AtSWEET10* (*At5g50790*), *AtSWEET11* (*At3g48740*), *AtSWEET12* (*At3g23660*), *AtSWEET13* (*At5g50800*), *AtSWEET 14* (*At4g25010*), *AtSWEET15* (*At5g13170*). Osmotic stress markers genes: *AtRD29a* (*At5G52310*) and *AtTIP1.2* (*At3G26520*). Photosynthesis genes: *AtRBCS* (*At1G67090*) and *AtCAB1* (*At1G29930*). Senescence marker gene: *AtSAG12* (*At5G13170*)

| Genes            | Accessions | Forward primers               | Reverse primers             |
|------------------|------------|-------------------------------|-----------------------------|
| <i>AtSUC1</i>    | AT1G71880  | GACCTTTCGACGCCTTGTC           | AATACTCCACTAATCGCCGCTG      |
| <i>AtSUC2</i>    | AT1G22710  | GGTAAGTGGTGTATTGGCGTTG        | GAGCCAAACAACCACTGCTAAA      |
| <i>AtSUC3</i>    | AT2G02860  | CAAGAACCGCAGCCGTAATC          | CTTGACCGCCACCGGAAT          |
| <i>AtSUC4</i>    | AT1G09960  | AGTGTC AAGCGAGGAACGCATA       | AGTCACACGAGAAGCCATTGC       |
| <i>AtSUC5</i>    | AT1G71890  | GGGCTATGGGATTCCATTAG          | TAAAAGACAGACGACCAAGG        |
| <i>AtSUC6</i>    | ATG543610  | TCCTGTCTCCGCTGCTT             | AGGCGCCCATAGCGATGA          |
| <i>AtSUC7</i>    | AT1G66570  | GTCTTTAAGAGACAAGCCCAC         | AGACTGTCTATCCACAGTCGT       |
| <i>AtSUC8</i>    | AT2G14670  | CTAGCTCCATAATCTCAAGT          | TTGGTAAGTTTCCACCTCCAAAA     |
| <i>AtSUC9</i>    | AT5G06170  | GTGGTTCCTGATGAGCCG            | GAGAAGCTGAACGTATGGG         |
| <i>AtSWEET9</i>  | AT2G39060  | ACGCCGTCATGTGGTTCTTT          | TGCTAGTTGGTTCTCTGTTGGC      |
| <i>AtSWEET10</i> | AT5G50790  | AACTCCTTTGCCTTTGTCTGTA        | GTCAACACGAAGATTGCGCC        |
| <i>AtSWEET11</i> | AT3G48740  | TCCTTCTCCTAACAACTTATATACCATG  | TCCTATAGAACGTTGGCACAGGA     |
| <i>AtSWEET12</i> | AT5G23660  | AAAGCTGATATCTTTCTTACTACTTCGAA | CTTACAAATCCTATAGAACGTTGGCAC |
| <i>AtSWEET13</i> | AT5G50800  | CTTCTACGTTGCCCTTCCAAATG       | CTTTGTTTCTGGACATCCTTGTTGA   |
| <i>AtSWEET14</i> | AT4G25010  | AAACGCTGTGGGATGCTTCA          | TTCAAGAGCCCAAGAACCTTCA      |
| <i>AtSWEET15</i> | AT5G13170  | CAATGACATATGCATAGCGATTCCAA    | GGACTCATCACGACAATACTCTTAAG  |
| <i>AtSAG12</i>   | AT5G45890  | TGGATACGGCGAATCTACTAACG       | GCTTTCATGGCAAGACCACATAG     |
| <i>AtRD29a</i>   | AT5G52310  | GAAAGGAGGAGGAGGAATGGTT        | GGAGCCAAGTGATTGTGGAGA       |
| <i>AtRBCS</i>    | AT1G67090  | ACGGTACTGGACAATGTGG           | CGAATCCGATGATCCTAATG        |
| <i>AtCAB1</i>    | AT1G29930  | CCAGAGGCATTCGCTGAGTTG         | CCTTACCAGTGACGATGGCTTG      |
| <i>AtTIP1.2</i>  | AT3G26520  | CAAGAACGGTAGTCTCGGAACA        | GACCAGCCCAGTAAACCCAGT       |
| <i>Reference</i> | AT5G12240  | AATATCGCTTTGCAGCTTCTG         | GATTTTGCAAGGCTTTCGAG        |

**Table S2** *AtSUC* and *AtSWEET* gene expression in different organs of plants for the six principal growth stages of *A. thaliana* grown hydroponically. Relative expression of *AtSUCs* and *AtSWEET* is measured by RT-qPCR. Data are expressed as normalized expression (no unit) to the reference gene *At5g12240* expression level (Czechowski et al. 2005) and are obtained from the pool of plants ( $n \geq 12$ ) of 11 independent experiments

|                  | Development stage |         |       |         |                         |         |           |         |       |                  |         |       |              |       |         |       |         |  |
|------------------|-------------------|---------|-------|---------|-------------------------|---------|-----------|---------|-------|------------------|---------|-------|--------------|-------|---------|-------|---------|--|
|                  | Young             |         | Adult |         | Inflorescence emergence |         | Flowering |         |       | Silique ripening |         |       | Seed harvest |       |         |       |         |  |
|                  | Root              | Rosette | Root  | Rosette | Root                    | Rosette | Root      | Rosette | Stem  | Root             | Rosette | Stem  | Silique      | Root  | Rosette | Stem  | Silique |  |
| <i>AtSUC1</i>    | 4.170             | 1.966   | 2.445 | 1.133   | 1.932                   | 2.014   | 1.959     | 3.010   | 2.313 | 2.908            | 2.621   | 3.204 | 1.035        | 3.138 | 2.603   | 4.925 | 0.853   |  |
| <i>AtSUC2</i>    | 0.847             | 6.000   | 0.616 | 3.630   | 0.753                   | 3.945   | 0.901     | 4.757   | 4.691 | 1.376            | 3.918   | 7.111 | 16.223       | 1.301 | 3.182   | 9.918 | 12.641  |  |
| <i>AtSUC3</i>    | 0.514             | 0.642   | 0.257 | 0.390   | 0.287                   | 0.429   | 0.349     | 0.470   | 0.463 | 0.349            | 0.555   | 0.514 | 0.403        | 0.314 | 0.460   | 0.753 | 0.145   |  |
| <i>AtSUC4</i>    | 0.240             | 0.123   | 0.149 | 0.091   | 0.140                   | 0.104   | 0.171     | 0.112   | 0.104 | 0.179            | 0.120   | 0.120 | 0.403        | 0.157 | 0.132   | 0.154 | 0.173   |  |
| <i>AtSUC5</i>    | ND                | ND      | ND    | ND      | ND                      | ND      | ND        | ND      | 0.101 | ND               | ND      | 0.084 | 2.676        | ND    | ND      | 0.089 | 2.329   |  |
| <i>AtSUC6</i>    | ND                | ND      | ND    | ND      | ND                      | ND      | ND        | ND      | ND    | ND               | ND      | ND    | ND           | ND    | ND      | ND    | ND      |  |
| <i>AtSUC7</i>    | ND                | ND      | ND    | ND      | ND                      | ND      | ND        | ND      | ND    | ND               | ND      | ND    | ND           | ND    | ND      | ND    | ND      |  |
| <i>AtSUC8</i>    | ND                | ND      | ND    | ND      | ND                      | ND      | ND        | ND      | ND    | ND               | ND      | ND    | ND           | ND    | ND      | ND    | ND      |  |
| <i>AtSUC9</i>    | ND                | ND      | ND    | ND      | ND                      | ND      | ND        | ND      | ND    | ND               | ND      | 0.001 | ND           | ND    | ND      | 0.001 | ND      |  |
| <i>AtSWEET9</i>  | ND                | ND      | ND    | ND      | ND                      | ND      | ND        | ND      | ND    | ND               | ND      | 0.304 | ND           | ND    | ND      | 0.057 | 0.063   |  |
| <i>AtSWEET10</i> | ND                | ND      | ND    | ND      | ND                      | ND      | ND        | ND      | 0.018 | ND               | ND      | 0.043 | 0.697        | ND    | ND      | 0.030 | 0.020   |  |
| <i>AtSWEET11</i> | 0.012             | 1.670   | 0.032 | 0.801   | 0.006                   | 0.660   | 0.010     | 1.310   | 0.241 | ND               | 1.329   | 0.966 | 3.681        | ND    | 1.790   | 1.283 | 0.227   |  |
| <i>AtSWEET12</i> | 0.004             | 0.082   | 0.060 | 0.117   | 0.040                   | 0.092   | 0.043     | 0.259   | 0.063 | 0.014            | 0.356   | 0.275 | 0.774        | 0.021 | 0.500   | 0.218 | 0.107   |  |
| <i>AtSWEET13</i> | 0.118             | 0.318   | 0.068 | 0.155   | 0.069                   | 0.157   | 0.079     | 0.164   | 0.071 | 0.057            | 0.157   | 0.354 | 0.444        | 0.040 | 0.137   | 0.451 | 0.366   |  |
| <i>AtSWEET14</i> | 0.025             | ND      | 0.009 | ND      | 0.008                   | ND      | 0.005     | ND      | 0.007 | 0.003            | ND      | 0.062 | 0.042        | 0.005 | ND      | 0.039 | 0.013   |  |
| <i>AtSWEET15</i> | 0.003             | 0.004   | 0.002 | 0.050   | 0.002                   | 0.080   | 0.001     | 0.028   | 0.009 | 0.002            | 0.768   | 0.232 | 0.232        | 0.003 | 1.231   | 0.235 | 0.235   |  |

**Table S3** Growth parameters of *A. thaliana* (cv Columbia) grown hydroponically. Dry weight (DW) measurements on roots, rosette and stem at six principal growth stages Shoot/Root ratio is calculated from DW of the same samples. Data are expressed as the mean  $\pm$  SE of seven to eight individual plants from two separated experiments. (-) organ not present

|                 | Plant stage development |              |                                |                  |                         |                     |
|-----------------|-------------------------|--------------|--------------------------------|------------------|-------------------------|---------------------|
|                 | <b>Young</b>            | <b>Adult</b> | <b>Inflorescence emergence</b> | <b>Flowering</b> | <b>Silique ripening</b> | <b>Seed harvest</b> |
| Root DW (mg)    | 4.1 (0.3)               | 41.4 (3.6)   | 108.9 (8.6)                    | 205.4 (23.1)     | 219 (26.4)              | 376.6 (24)          |
| Rosette DW (mg) | 22.2 (1.7)              | 232.6 (17.1) | 693.7 (61)                     | 1274.6 (97.6)    | 1511.3 (200.8)          | 1626.6 (146.4)      |
| Stem DW (mg)    | -                       | -            | 2.3 (0.5)                      | 193.9 (44.9)     | 1008.7 (93)             | 3515.1 (742.4)      |
| Shoot:Root DW   | 5.5 (0.4)               | 5.7 (0.2)    | 6.4 (0.2)                      | 7.3 (0.3)        | 12 (0.8)                | 13.3 (1.3)          |

**Table S4** Expression of *AtSAG12*, *AtRBCS* and *AtCABI* genes in leaves at the 6 different growth stages. Relative expression is measured by RT-qPCR. Data are expressed as normalized expression (no unit) to the reference gene *At5g12240* expression level (Czechowski et al. 2005) and are obtained from the pool of plants ( $n \geq 12$ ) of 11 independent experiments

|                | Young   | Adult   | Inflorescence emergence | Flowering | Silique ripening | Seed harvest |
|----------------|---------|---------|-------------------------|-----------|------------------|--------------|
| <i>AtRBCS</i>  | 4803.93 | 3147.52 | 2134.97                 | 1584.71   | 625.99           | 415.87       |
| <i>AtCABI</i>  | 1552.09 | 989.12  | 935.76                  | 1192.69   | 661.68           | 372.22       |
| <i>AtSAG12</i> | 0.07    | 0.16    | 0.34                    | 0.03      | 1.04             | 0.90         |
